# Supplementary material
Source: Springer Nature journal article supplement (https://www.springerprofessional.de/resource/supplementary/13638_2010_122_MOESM10_ESM.pdf/11897092)

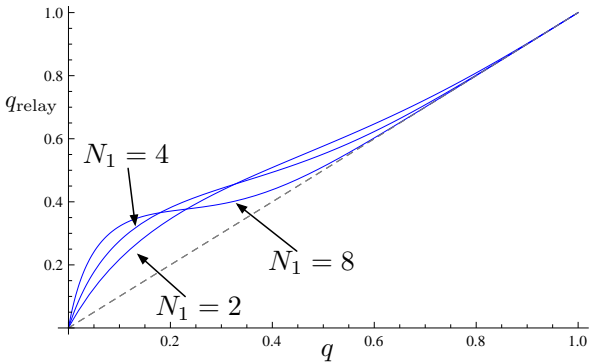

Supplement: MOESM10 [file 11897092]
